# Supplementary material for: Toxicological assessment of TiO2nanoparticles by recombinant Escherichia coli bacteria
Source: Royal Society of Chemistry journal article supplement (doi:10.1039/c0em00499e), 2010-12-03
Supplement: c0em00499e.pdf [file c0em00499e.pdf]

## Toxicological Assessment of TiO<sub>2</sub> Nanoparticles by Recombinant *Escherichia coli*

### Bacteria

*Guoxiang Jiang, Zhenyao Shen, Junfeng Niu, Yueping Bao, Jing Chen, Tiande He*

State Key Laboratory of Water Environment Simulation, School of Environment,  
Beijing Normal University, Beijing 100875, P. R. China.

Fluorescence excitation and emission scan spectra were generated by collecting scan spectra over a range of emission wavelengths (500-600 nm emission wavelength in increments of 1 nm under 488 nm excitation wavelength) and excitation wavelengths (230-500 nm excitation wavelength in increments of 1 nm under 520 nm emission wavelength). The fluorescence excitation and emission scan spectra showed that nano-TiO<sub>2</sub> under 520 nm emission wavelength did not display any fluorescence when irradiated at 488 nm.

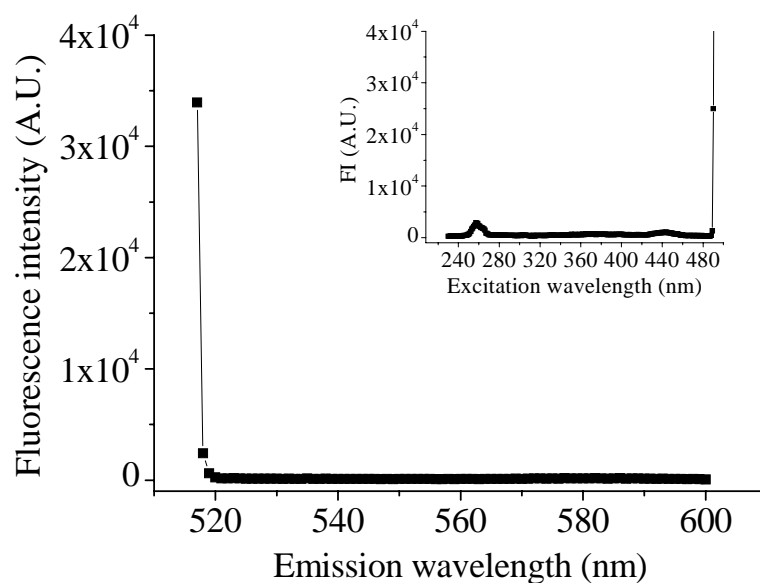

Fig. S1. The fluorescence emission and excitation (inserted picture) scan spectra of 20  $\mu\text{g mL}^{-1}$  nano-TiO<sub>2</sub>. The emission scan spectrum was generated by collecting fluorescence intensity over a range of emission wavelengths (500-600 nm) under 488 nm excitation wavelength. The inserted picture illustrates the excitation scan spectrum (230-500 nm) of nano-TiO<sub>2</sub> under 520 nm emission wavelength.
